# Supplementary material for: Ranolazine Attenuates Brain Inflammation in a Rat Model of Type 2 Diabetes
Source: MDPI journal article supplement (doi:10.3390/ijms232416160), 2022-12-18
Supplement: s1 [file s1]

HCD/NEA  
 HCD/ST+RNA  
 HCD/ST+MET  
 HCD+MET  
 HCD+RNA  
 HCD/ST+NEA

GAP 1:500  
 1:500

- 75 KDa

- 90 KDa

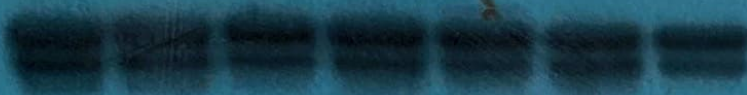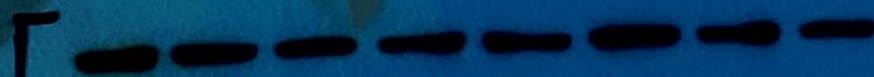

- 32

MS2  $\beta$  Activ  
 (1:20,000)

- 25 KDa

$\beta$ -actin  
 1:40,000

20<sup>h</sup>



27/04/21

GFAP 1:500

5 sec exp.

NCD + VEH  
HFD / STZ + VEH  
HFD / STZ + RAN  
HFD / STZ + VEH  
NCD + RAN  
NCD + RAN

GFAP  
1:500

— 50 KDa

— 37

25

30

MS2 βactin  
(1:50,000)



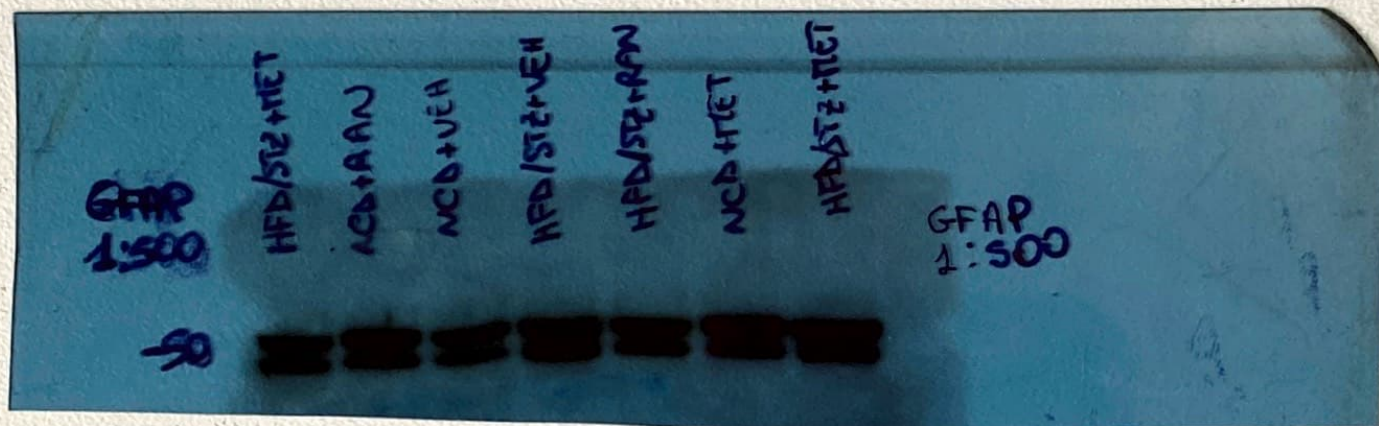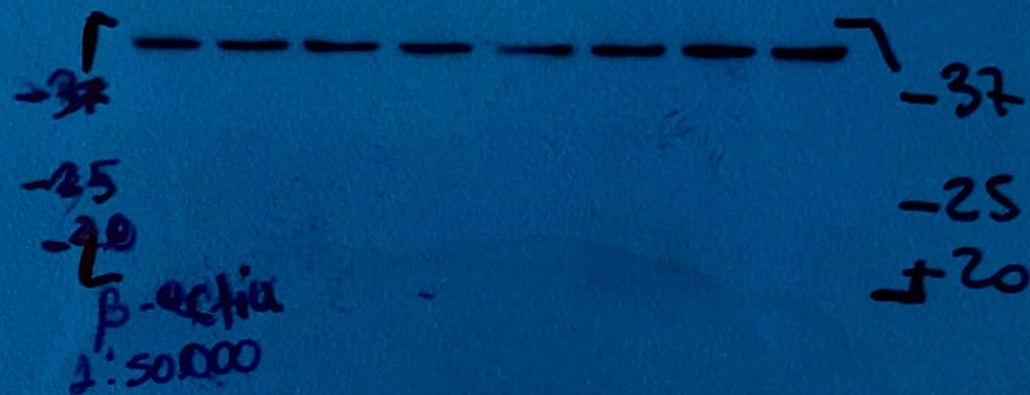

MS2  $\beta$ -actin  
(1:50000)

1'

13.11.20
